# Supplementary material
Source: publisher figshare collection journal article supplement (https://sage.figshare.com/ndownloader/files/17505704)
Supplement: Supplementary file 1 [file 17505704]

Reviewer 1 v.2

The authors have clarified most of the comments adequately. However, the discussion needs to be strengthened

For example,

Why is only TNF -alpha important in COPD, when there are so many other inflammatory mediators

What is the possibility in the future that TNF-alpha levels can be used as a biomarker for COPD severity, COPD exacerbations, COPD progression and mortality.

Is it likely that TNF-alpha antagonists may have value in the management of COPD, then it would be useful to study TNF-alpha levels

Whether tissue/BAL TNF-alpha levels have a stronger association with COPD, COPDAE than serum levels of TNF-alpha

Table 1

The PICOS table should also contain the search strategy terms used for each heading

Table 2

Table 2. Exclusion standed - meaning not clear

Please separate TNF-alpha levels from tissue and BAL studies and serum studies and present them separately. Both of these cannot be compared to each other and need to be analysed separately.
